# Supplementary material for: Zebrafish diencephalic A11-related dopaminergic neurons share a conserved transcriptional network with neuroendocrine cell lineages
Source: Oxford University Press journal article supplement (doi:10.1242/dev.033878), 2009-02-20
Supplement: dev033878-sup-033878-tables1.pdf [file dev033878-sup-033878-tables1.pdf]

**Table S1. Summary of changes in gene expression in *arnt2*<sup>m1055</sup> mutant embryos**

| Category of analyzed gene expression     | Gene                | Stages analyzed | Altered expression |
|------------------------------------------|---------------------|-----------------|--------------------|
| Proliferation                            | <i>mcm5</i>         | 36, 60 hpf      | No                 |
|                                          | <i>pcna</i>         | 36, 60 hpf      | No                 |
| Patterning+differentiation               | <i>arnt2</i>        | 24 hpf          | Yes                |
|                                          | <i>dlx2</i>         | 32 hpf          | No                 |
|                                          | <i>dlx4</i>         | 32 hpf          | No                 |
|                                          | <i>fez1</i>         | 48 hpf          | No                 |
|                                          | <i>foxa2</i>        | 32 hpf          | No                 |
|                                          | <i>lim1</i>         | 32 hpf          | No                 |
|                                          | <i>nk2.1</i>        | 32 hpf          | No                 |
|                                          | <i>nk2.2</i>        | 32 hpf          | No                 |
|                                          | <i>nk5.1</i>        | 32 hpf          | No                 |
|                                          | <i>otpa</i>         | 24, 48, 72 hpf  | No                 |
|                                          | <i>otpb</i>         | 24, 48, 72 hpf  | No                 |
|                                          | <i>pou47</i>        | 24-72 hpf       | Yes                |
|                                          | <i>pou50</i>        | 32 hpf          | No                 |
|                                          | <i>shh</i>          | 32 hpf          | No                 |
|                                          | <i>sim1a</i>        | 24-72 hpf       | No                 |
|                                          | <i>sim1b</i>        | 24-72 hpf       | Yes                |
|                                          | <i>sim2</i>         | 24-72 hpf       | No                 |
| Neurotransmitter/neurohormone expression | <i>crh</i>          | 3, 4 dpf        | Yes                |
|                                          | <i>itnp</i>         | 3, 4 dpf        | Yes                |
|                                          | <i>sst1</i>         | 3, 4 dpf        | Yes                |
|                                          | <i>th</i>           | 24-120 hpf      | Yes                |
|                                          | <i>trh</i>          | 3, 4 dpf        | Yes                |
|                                          | <i>vsnp</i>         | 3, 4 dpf        | Yes                |
| Others                                   | <i>dat (slc6a3)</i> | 78 hpf          | Yes                |
|                                          | <i>ddc</i>          | 78 hpf          | Yes                |
|                                          | <i>tphD1</i>        | 72 hpf          | No                 |

Gene expression was analyzed by whole-mount in situ hybridization using embryos derived from a cross of heterozygous carriers of the *arnt2*<sup>m1055</sup> allele. The tails of the stained embryos were used for genotyping and expression of markers was compared by light microscopy in homozygous mutants and wild-type siblings. All analyzed batches contained at least 50 embryos.
