# Supplementary material for: Zebrafish diencephalic A11-related dopaminergic neurons share a conserved transcriptional network with neuroendocrine cell lineages
Source: Oxford University Press journal article supplement (doi:10.1242/dev.033878), 2009-02-20
Supplement: dev033878-sup-033878-tables2.pdf [file dev033878-sup-033878-tables2.pdf]

**Table S2. Reduction of neurosecretory cell types in the hypothalamus of *arnt2*<sup>m1005</sup> mutant embryos and *sim1a* morpholino-injected embryos**

|             | <i>arnt2</i> <sup>m1055</sup>                           | <i>sim1a</i> MO                                                          | <i>sim1a</i> + <i>p53</i> MO                                             | Control MO                                   |
|-------------|---------------------------------------------------------|--------------------------------------------------------------------------|--------------------------------------------------------------------------|----------------------------------------------|
| <i>crh</i>  | Strongly reduced/absent (10/10)                         | Strongly reduced/absent (19/23), reduced (4/23)                          | Strongly reduced/absent (8/10), reduced (2/10)                           | Not reduced (15/15)                          |
| <i>itnp</i> | Strongly reduced/absent (10/10) ectopic location (0/10) | Strongly reduced/absent (29/30), reduced (1/30) ectopic location (29/30) | Strongly reduced/absent (11/12), reduced (1/12) ectopic location (10/12) | Not reduced (15/15), ectopic location (0/15) |
| <i>sst1</i> | Strongly reduced/absent (13/13)                         | Strongly reduced/absent (17/22), reduced (2/22) not reduced (3/22)       | Strongly reduced/absent (9/12), not reduced (3/12)                       | Not reduced (15/15)                          |
| <i>trh</i>  | Strongly reduced/absent (12/12)                         | Strongly reduced/absent (28/28)                                          | Strongly reduced/absent (10/10)                                          | Not reduced (15/15)                          |
| <i>vsnp</i> | Strongly reduced/absent (10/10)                         | Strongly reduced/absent (32/32)                                          | Strongly reduced/absent (10/10)                                          | Not reduced (15/15)                          |

Expression of *crh*, *trh*, *itnp*, *vsnp* and *sst1* was analyzed by whole-mount in situ hybridization at 3-4 dpf. Embryos derived from heterozygous *arnt2*<sup>m1055</sup> carriers were genotyped and expression of markers in homozygous mutants was compared with that of wild-type siblings. In case of *sim1a* morphants, expression of markers was analyzed in wild-type embryos injected with 1 ng *sim1a* splice morpholino alone or 1 ng *sim1a* splice morpholino together with 6.5 ng *p53* ATG morpholino, and compared with embryos injected with 4.5 ng control morpholino. Note that for *crh*, *sst1*, *trh* and *vsnp*, not all groups expressing the respective neurohormone are reduced in *arnt2*<sup>m1055</sup> mutants and *sim1a* morphants. For those genes, the numbers represent only those groups that are actually affected.
